# Supplementary material
Source: ML conference proceedings conference paper supplement (https://aclanthology.org/D12-1125)
Supplement: Attachment [file optperm_supp.pdf › submit/optperm_supp.pdf]

# Derivation of the mapping optimization algorithm in the paper

March 29, 2012

Recall that our objective is given by (we neglect the  $F_{verb}(A)$  since it is convex and adding it is straightforward):

$$F(A) = D_{KL}[p_S(c_1, c_2)|p_T(c_1, c_2; A)] + \min_{r(c_1, c_2) \in \mathcal{S}} D_{KL}[r(c_1, c_2)|p_T(c_1, c_2; A)] + H[A] \quad (1)$$

We assume the weights  $\alpha_i$  and the coefficient  $\lambda$  are one for simplicity. Other values can easily be plugged in.

Since we are minimizing over  $A$  we can recast the problem as minimization over both  $A$  and  $r \in \mathcal{S}$  of the objective:

$$F(A, r) = D_{KL}[p_S(c_1, c_2)|p_T(c_1, c_2; A)] + D_{KL}[r(c_1, c_2)|p_T(c_1, c_2; A)] + H[A] \quad (2)$$

We now recall the variational property of entropy,<sup>1</sup>

$$H[p] = - \sum_x p(x) \log p(x) = \min_q - \sum_x p(x) \log q(x) \quad (3)$$

Where optimization is over distributions  $q$ . Thus we can again expand  $F$  to contain another variable  $q(c|f)$  such that:

$$F(A, r, q) = D_{KL}[p_S(c_1, c_2)|p_T(c_1, c_2; A)] + D_{KL}[r(c_1, c_2)|p_T(c_1, c_2; A)] - \sum_{f, c} A(c|f) \log q(c|f) \quad (4)$$

Clearly  $F(A, r, q) \geq F(A)$  for all  $r, q$  and  $\min_{r, q} F(A, r, q) = F(A)$ . Thus, we can proceed in alternating optimization over  $A, r, q$ .

We can now see how the algorithm in the paper is obtained. Denote by  $A^k, r^{k-1}, q^{k-1}$  the values of these variables at iteration  $k$ . Then:

$$r^k(c_1, c_2) = \arg \min_{r(c_1, c_2) \in \mathcal{S}} D_{KL}[r(c_1, c_2)|p_T(c_1, c_2; A^k)] \quad (5)$$

This clearly corresponds to steps 1 and 2 in the algorithm.

---

<sup>1</sup>This is a direct result of  $D_{KL}[p|q] \geq 0$  and zero if and only if  $p = q$ .

---

Next, we optimize over  $q$ , which results in:

$$q^k(c|f) = A^k(c|f) \quad (6)$$

for all  $c, f$ . We now turn to optimizing over  $A$ . The objective as a function of  $A$ , given the current  $q^k, r^k$  is (up to additive constants)

$$F^k(A) = - \sum_{c_1, c_2} [p_S(c_1, c_2) + r^k(c_1, c_2)] \log p_T(c_1, c_2; A) - \sum_{f, c} A(c|f) \log A^k(c|f)$$

This is non-convex due to the bilinear form of  $p_T(c_1, c_2; A)$ . To simplify things further we use the standard EM trick and define an auxiliary function:

$$\begin{aligned} \bar{F}^k(A) \equiv & - \sum_{c_1, c_2, f_1, f_2} p(f_1, f_2 | c_1, c_2; A^k) [p_S(c_1, c_2) + r^k(c_1, c_2)] \log p_T(c_1, f_1, c_2, f_2; A) \\ & - \sum_{f, c} A(c|f) \log A^k(c|f) + g(A^k) \end{aligned}$$

where  $p(f_1, f_2 | c_1, c_2; A^k)$  is the posterior calculated in step 3 of the algorithm and  $g(A^k)$  is a function of  $A^k$  and not  $A$ .<sup>2</sup> As in standard EM, it can be shown that  $F^k(A) \leq \bar{F}^k(A)$  with equality if  $A = A^k$ . Thus we can minimize  $\bar{F}^k(A)$  over  $A$  and decrease the objective  $F(A, r, q)$ .

Using the notation in step 4 of the paper, this simplifies to:

$$\begin{aligned} \bar{F}^k(A) = & - \sum_{c_1, c_2, f_1, f_2} N^k(c_1, c_2, f_1, f_2) \log p_T(c_1, f_1, c_2, f_2; A) \\ & - \sum_{f, c} A(c|f) \log A^k(c|f) + g(A^k) \end{aligned}$$

We can now use the fact that  $p_T(c_1, f_1, c_2, f_2; A)$  factors according to:

$$p_T(c_1, f_1, c_2, f_2; A) = A(c_1|f_1)A(c_2|f_2)p_T(f_1, f_2) \quad (7)$$

to obtain (up to additive constants):

$$\begin{aligned} \bar{F}^k(A) \equiv & - \sum_{c, f} N_1^k(c, f) \log A(c|f) - \sum_{c, f} N_2^k(c, f) \log A(c|f) \\ & - \sum_{f, c} A(c|f) \log A^k(c|f) \end{aligned}$$

And using the definition of  $M^k$  in step 5 of the paper, we obtain that:

$$\bar{F}^k(A) \equiv - \sum_{c, f} [M^k(c, f) \log A(c|f) + A(c|f) \log A^k(c|f)]$$

---

<sup>2</sup>It is given by  $g(A^k) = - \sum_{c_1, c_2} [p_S(c_1, c_2) + r^k(c_1, c_2)] H[p(f_1, f_2 | c_1, c_2; A^k)]$ .

---

We now just need to minimize it over  $A$ , and this indeed corresponds to step 6 in the algorithm (except for the term  $F_{verb}(A)$  which is straightforward to add).

The above establishes that the  $F$  objective decreases monotonically with each update. Convergence to local optima can be established as in EM.
